# Supplementary material for: Effects of carbon defects on interfacial anchoring of NiFe-LDH for seawater electro-oxidation
Source: Royal Society of Chemistry journal article supplement (doi:10.1039/d2ta09562a), 2023-01-01
Supplement: d2ta09562a1.pdf [file d2ta09562a1.pdf]

## Supporting Information

### Effects of Carbon Defects on Interfacial Anchoring of NiFe-LDH for Seawater Electro-oxidation

Heng Xu,<sup>a</sup> Shi-Jun Xie,<sup>b</sup> Chao Lv,<sup>b</sup> Jun-Tao Li,<sup>b</sup> Yao Zhou,<sup>\*b</sup> Shi-Gang Sun<sup>\*a</sup>

<sup>a</sup> College of Chemistry and Chemical Engineering, Xiamen University, Xiamen 361005, China

<sup>b</sup> College of Energy, Xiamen University, Xiamen 361005, China.

E-mail: sgsun@xmu.edu.cn; [zhouy@xmu.edu.cn](mailto:zhouy@xmu.edu.cn)

**Table S1.** Calculated integrated area ratio  $I_D/I_G$  from the Raman spectrum of the four CFD<sub>r</sub> samples.

| CFD <sub>r</sub>    | Sample | <i>r</i> ( $I_D/I_G$ ) | average   |
|---------------------|--------|------------------------|-----------|
|                     |        | intensity ratio        |           |
| CFD <sub>0.11</sub> | 1      | 0.13                   | 0.11±0.02 |
|                     | 2      | 0.11                   |           |
|                     | 3      | 0.09                   |           |
| CFD <sub>0.26</sub> | 1      | 0.21                   | 0.26±0.03 |
|                     | 2      | 0.29                   |           |
|                     | 3      | 0.27                   |           |
| CFD <sub>0.42</sub> | 1      | 0.38                   | 0.42±0.03 |
|                     | 2      | 0.46                   |           |
|                     | 3      | 0.41                   |           |
| CFD <sub>0.51</sub> | 1      | 0.53                   | 0.51±0.02 |
|                     | 2      | 0.47                   |           |
|                     | 3      | 0.52                   |           |

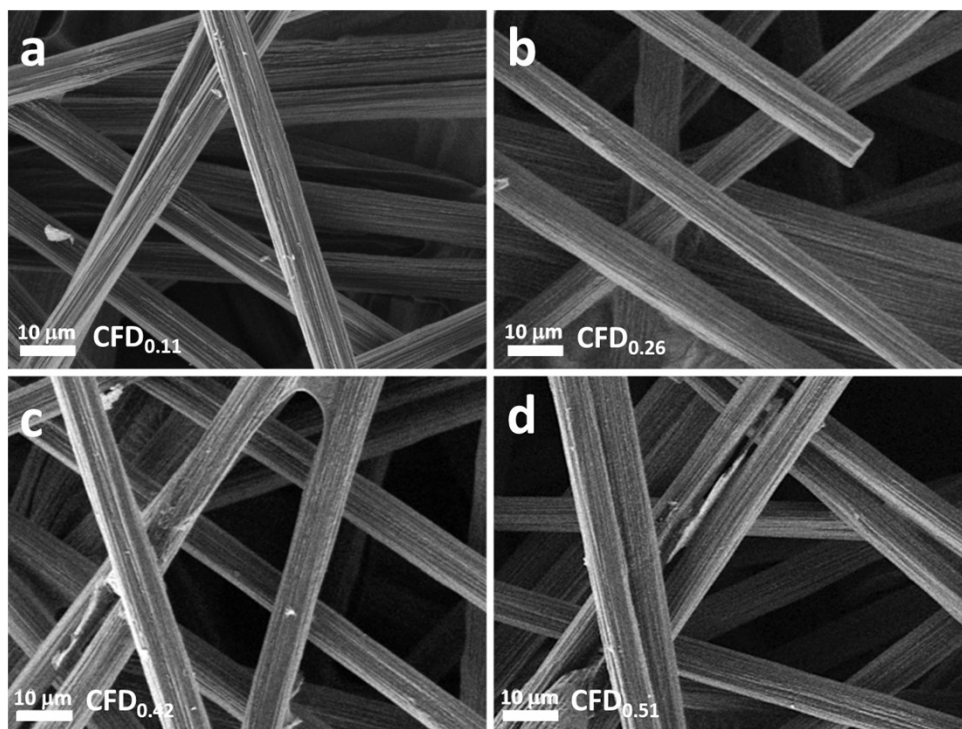

**Figure. S1.** SEM images of the four  $\text{CFD}_r$  samples.

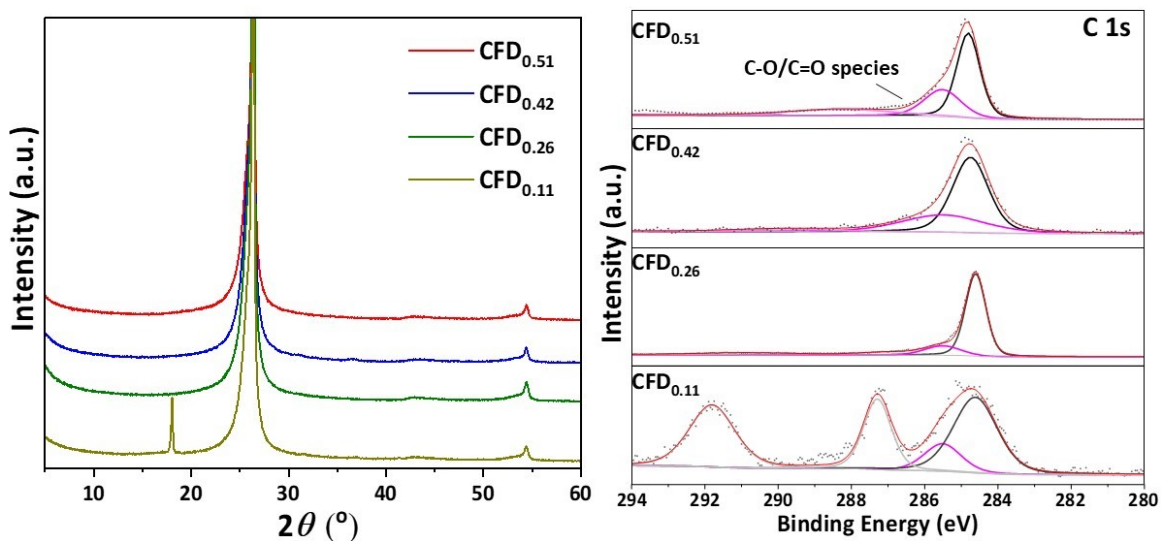

**Figure S2.** (Left) XRD patterns and (Right) C 1s XPS of the four bare  $\text{CFD}_r$ . Note that the pristine commercial sample  $\text{CFD}_{0.11}$  demonstrates a peak at around  $18.0^\circ$  in the XRD pattern and the two additional peaks at higher binding energy in its XPS spectrum, which is assigned to the PTFE coating.

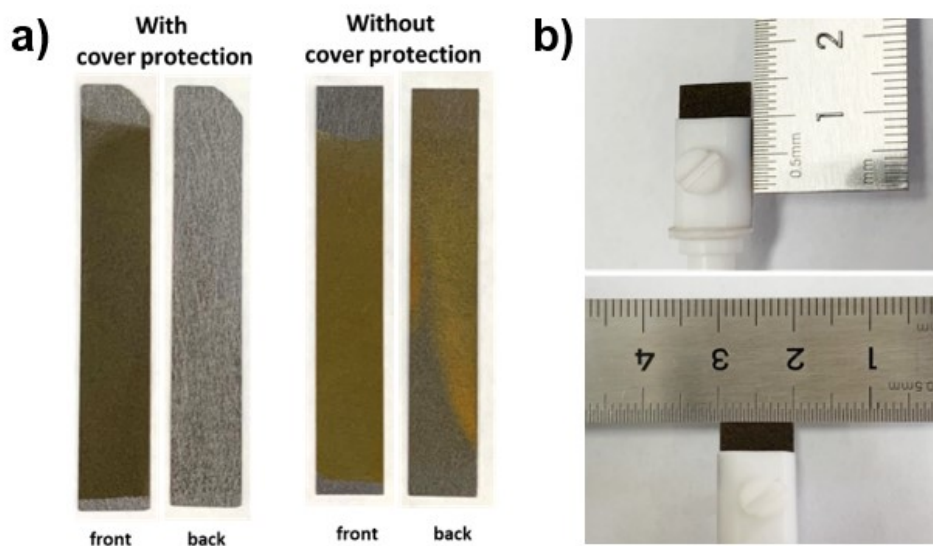

**Figure S3.** Optical photographs of a) controlled homogenous growth of binder-free NiFe-LDH on defective carbon fabrics with and without one side of the carbon fabric being covered. b) working electrode with exact  $0.5 \times 1.0$  cm carbon fabric.

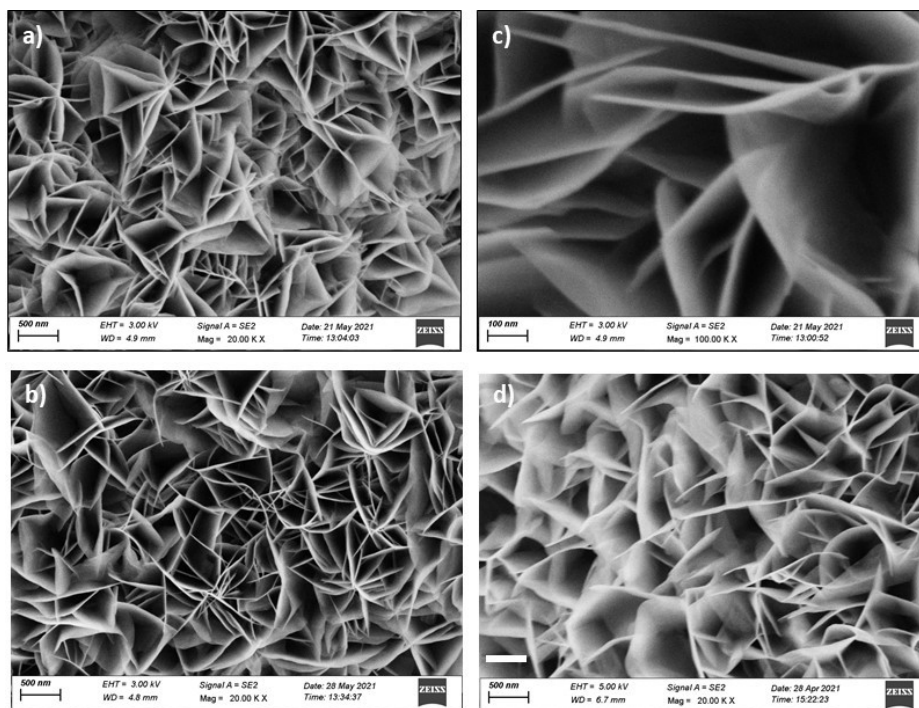

**Figure S4.** SEM images of a) NiFe/CFD<sub>0.11</sub>, b) NiFe/CFD<sub>0.26</sub>, c) NiFe/CFD<sub>0.42</sub>, and d) NiFe/CFD<sub>0.51</sub>. All the NiFe-LDHs on-site grown on the defected carbon have similar staggered homogenous arrays with thin sheets of 12-13 nm thickness.

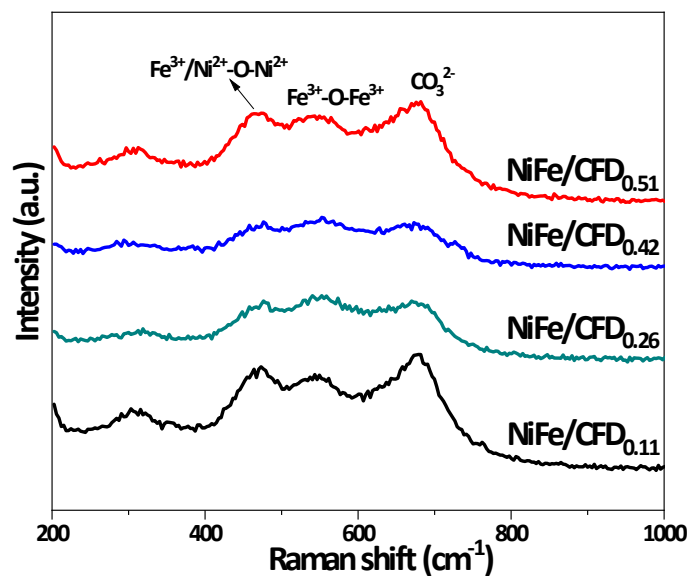

**Figure S5.** Raman spectroscopy of the binder-free NiFe-LDH/carbon fabric electrodes (NiFe/CFD<sub>r</sub>). The representative shifts around 460 and 550 cm<sup>-1</sup> are characteristic of Fe<sup>3+</sup>/Ni<sup>2+</sup>-O-Ni<sup>2+</sup> and Fe<sup>3+</sup>-O-Fe<sup>3+</sup> bonds while the shift around 690 cm<sup>-1</sup> is attributed to the productive intercalation of carbonate anions.

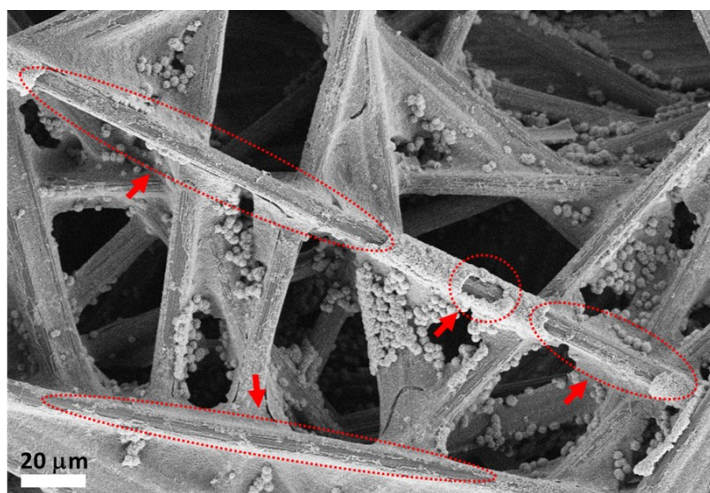

**Figure S6.** SEM image of the spent NiFe/CFD<sub>0.11</sub> sampled at the point marked by the red circle shown in Fig.5a in the main text.

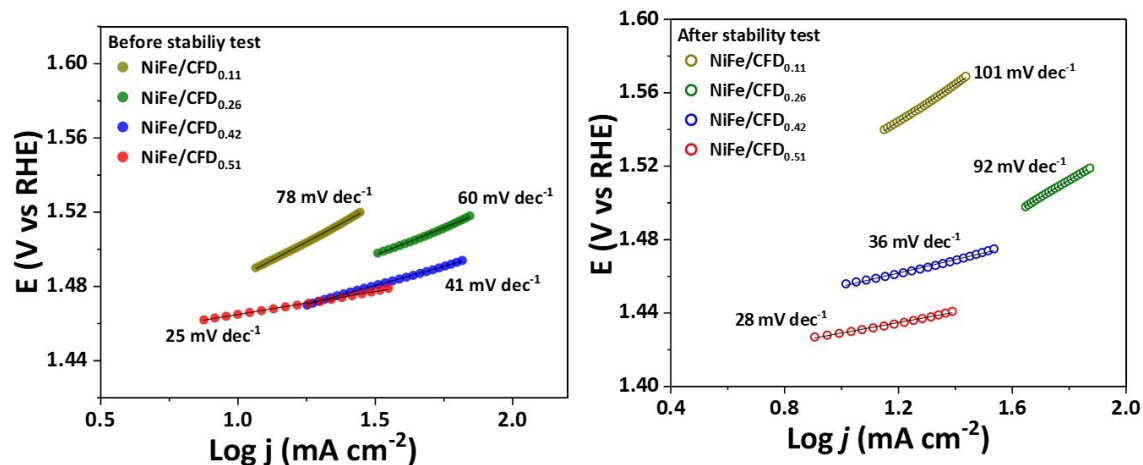

**Figure S7.** Tafel slopes of the NiFe-LDH array coated electrodes (left) before and (right) after the short-term stability test in 1M KOH + 2M NaCl for 160 h.

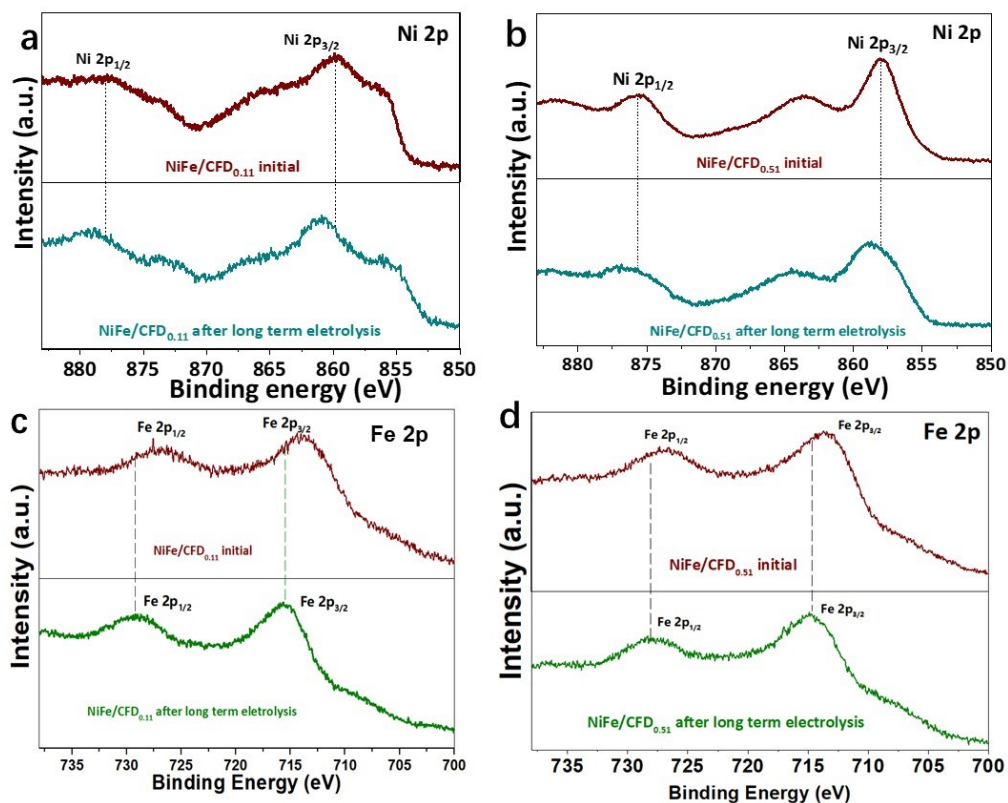

**Figure S8.** (a,b) Ni 2p and (c,d) Fe 2p XPS spectra in the (a,c) NiFe/CFD<sub>0.11</sub> and (b,d) NiFe/CFD<sub>0.51</sub> before and after the stability test.

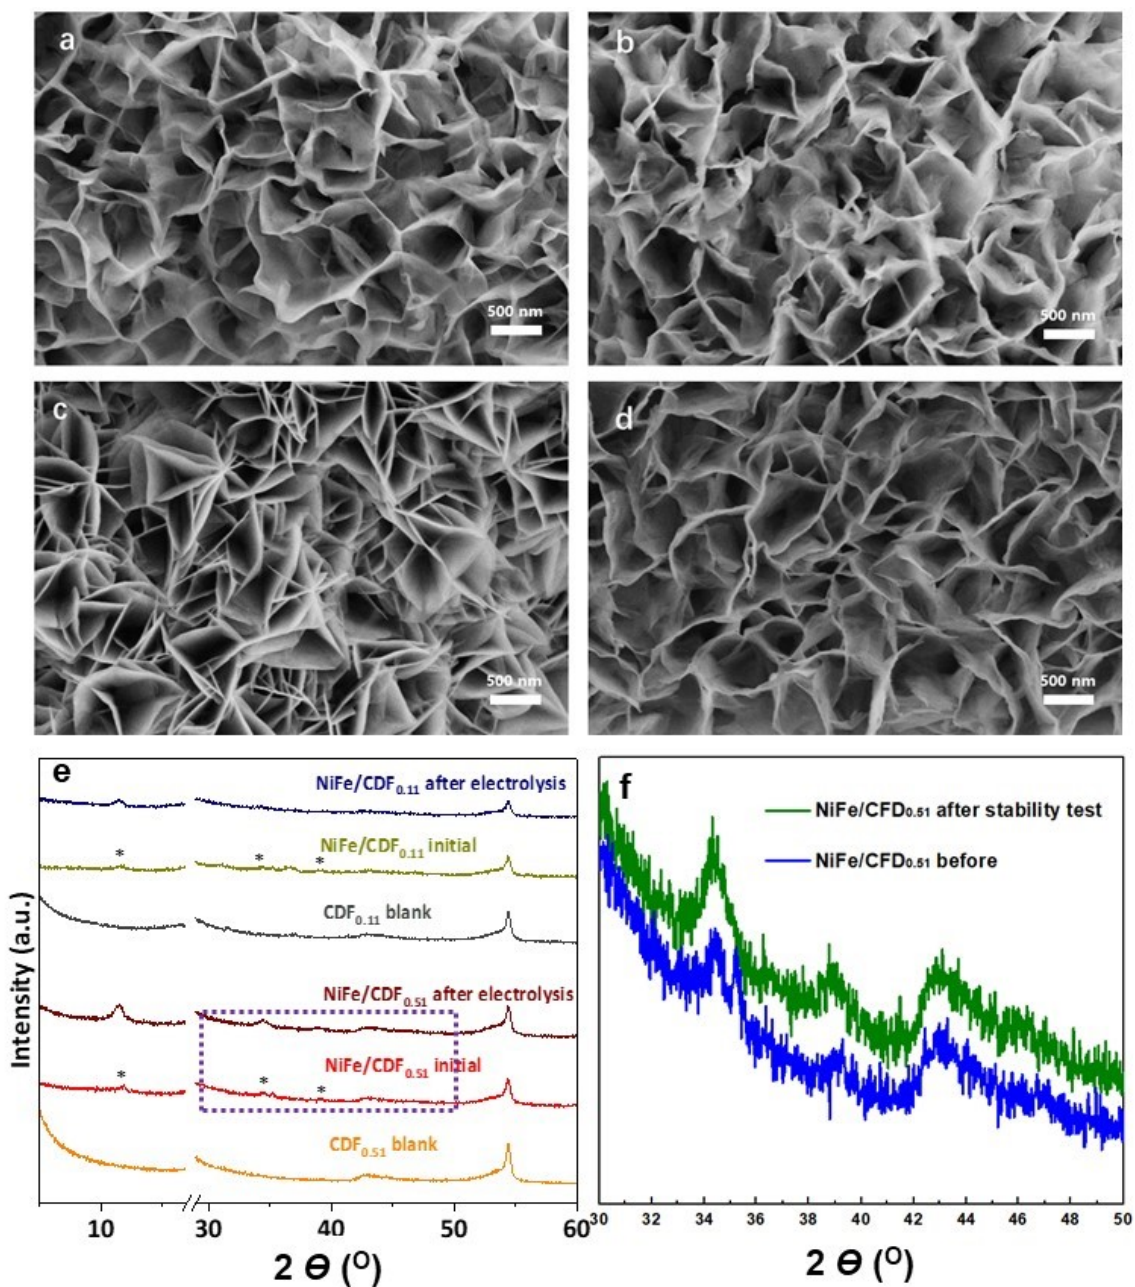

**Figure S9.** SEM images of NiFe/CDF<sub>0.11</sub> (a) before and (b) after the long-term electrolysis; SEM images of NiFe/CDF<sub>0.51</sub> (c) before and (d) after the long-term electrolysis; (e) Comparison of the XRD patterns of the blank CDF and the NiFe/CDF<sub>0.51</sub> and NiFe/CDF<sub>0.11</sub> before and after the stability tests; (f) Enlarged XRD patterns framed in (e). Note that the CDF has strong XRD peaks owing to the PTFE coating, as a result of which the peaks of NiFe-LDH look weak apparently.

**Table S2.** Performance comparison of different NiFe-based electrocatalysts supported on

various carbonaceous substrates.

| Composite electrodes                          | Overpotential<br>(mV)<br>@10mV cm <sup>-2</sup> | Tafel<br>slope<br>(mV<br>dec <sup>-1</sup> ) | Stability | Test condition<br>@ $\eta_{mA\ cm^{-2}}$ | Ref.         |
|-----------------------------------------------|-------------------------------------------------|----------------------------------------------|-----------|------------------------------------------|--------------|
| NiFe/CDF <sub>0.51</sub>                      | 233                                             | 25                                           | 550 h     | 1 M KOH +<br>seawater @ $\eta_{500}$     | This<br>work |
| NiFe/CDF <sub>0.42</sub>                      | 236                                             | 41                                           | 160 h     | 1 M KOH + saline<br>@ $\eta_{200}$       | This<br>work |
| NiFe/CDF <sub>0.26</sub>                      | 240                                             | 60                                           | 160 h     | 1 M KOH + saline<br>@ $\eta_{200}$       | This<br>work |
| NiFe/CDF <sub>0.11</sub>                      | 253                                             | 78                                           | 12 h      | 1 M KOH + saline<br>@ $\eta_{150}$       | This<br>work |
| Ni <sub>2/3</sub> Fe <sub>1/3</sub> -GO       | 230                                             | 42                                           | 10 h      | 1 M KOH @ $\eta_{10}$                    | [1]          |
| NiCoPS/CC                                     | 230                                             | 62.3                                         | 40 h      | 1 M KOH @ $\eta_{10}$                    | [2]          |
| Co <sub>0.8</sub> Fe <sub>0.2</sub> OOH@C/CFP | 254                                             | 46                                           | 360 h     | 1 M KOH @ $\eta_{100}$                   | [3]          |
| CoNi <sub>x</sub> S <sub>y</sub> /NCP         | 278                                             | 71                                           | 10 h      | 0.1 M KOH @ $\eta_{13}$                  | [4]          |
| Ni <sub>2</sub> Fe-SDS-LDH/CFP                | 289                                             | 39                                           | 10h       | 1 M KOH @ $\eta_{10}$                    | [5]          |
| NiS <sub>2</sub> -Ni(OH) <sub>2</sub> /CNT    | 290                                             | 110                                          | 70 h      | 1 M KOH @ $\eta_{10}$                    | [6]          |
| NCFPO/C@CC                                    | 300                                             | 53                                           | 100 h     | 1 M KOH + saline<br>@ $\eta_{50}$        | [7]          |
| NiFe-LDH/Co,N-CNF                             | 312                                             | 60                                           | 80 h      | 6 M KOH @ $\eta_{25}$                    | [8]          |
| AC-NiO                                        | 320                                             | 49                                           | 10 h      | 1 M KOH @ $\eta_{10}$                    | [9]          |
| Ni/NiO/N-doped AC                             | 346                                             | 70                                           | 30 h      | 0.1 M KOH @ $\eta_{30}$                  | [10]         |
| MHCM-z-BCC                                    | 350                                             | -                                            | 100 h     | buffered seawater<br>@ $\eta_{14}$       | [11]         |

CNT, carbon nanotubes; CFP, carbon fiber paper; CNF, codoped carbon nanoframes; GO, graphene oxide; NCP, N-enriched porous carbon polyhedron; CC, carbon cloth; AC, activated carbon.

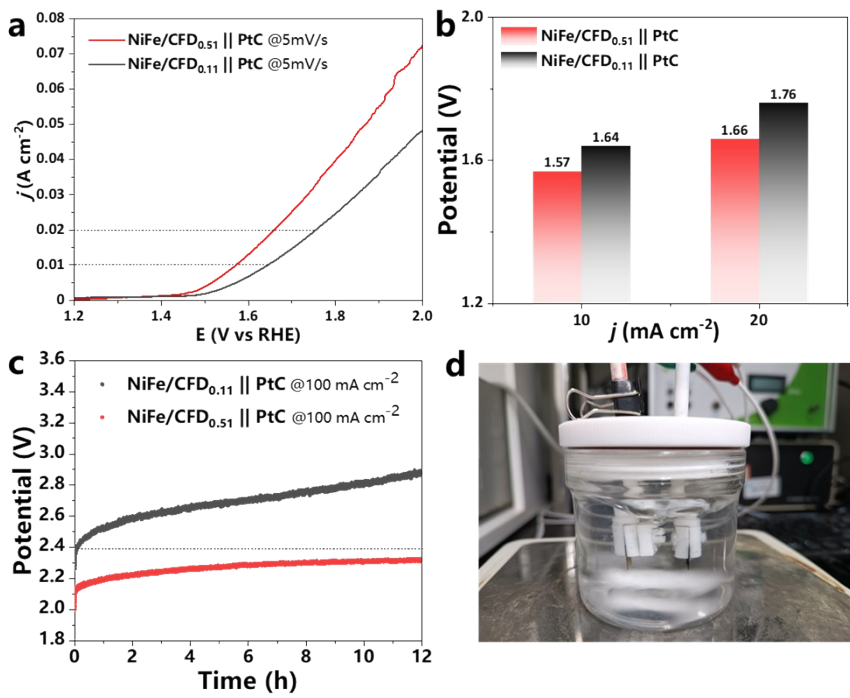

**Figure S10.** Comparison of the full water splitting in simulated seawater (1M KOH + 0.5M NaCl) using Pt/C as the cathodic electrocatalyst and the NiFe/CFD<sub>0.11</sub> or NiFe/CFD<sub>0.51</sub> as the anodic electrocatalysts: (a) the relevant two-electrode polarization curves and (b) comparison of full-cell potential under different current densities; (c) the galvanostatic profiles; (d) digital photo of the two-electrode cell for full water splitting.



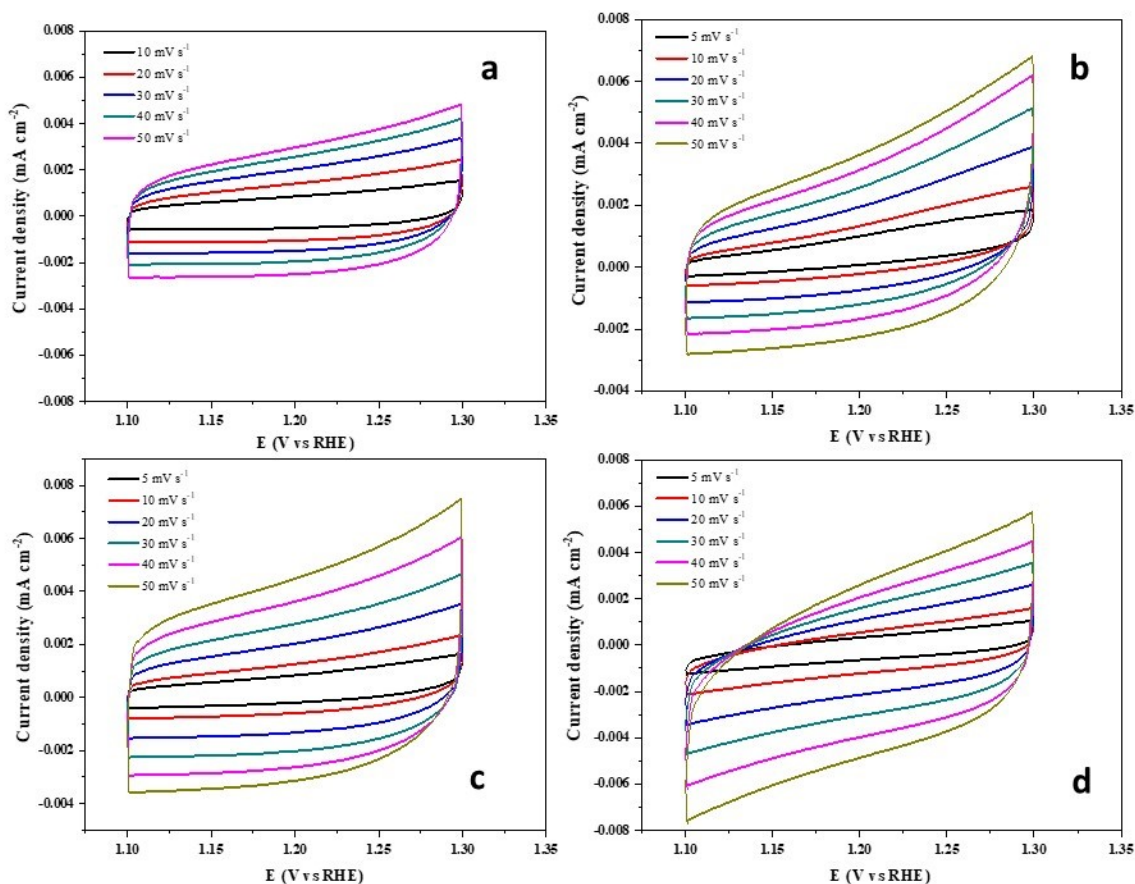

**Figure S11.** Cyclic voltammograms of (a) NiFe/CFD<sub>0.11</sub>, (b) NiFe/CFD<sub>0.26</sub>, (c) NiFe/CFD<sub>0.41</sub>, (d) NiFe/CFD<sub>0.51</sub> electrocatalysts in the region of 0.1 - 0.3 V vs RHE in 1 M KOH.

## References

- [1] W. Ma, R. Ma, C. Wang, J. Liang, X. Liu, K. Zhou, T. Sasaki, A Superlattice of Alternately Stacked Ni-Fe Hydroxide Nanosheets and Graphene for Efficient Splitting of Water, *ACS Nano*. 9 (2015) 1977–1984.
- [2] J. Li, Z. Xia, X. Zhou, Y. Qin, Y. Ma, Y. Qu, Quaternary pyrite-structured nickel/cobalt phosphosulfide nanowires on carbon cloth as efficient and robust electrodes for water electrolysis, *Nano Res.* 10 (2017) 814–825.
- [3] X. Han, C. Yu, Y. Niu, Z. Wang, Y. Kang, Y. Ren, H. Wang, H.S. Park, J. Qiu, Full Bulk-Structure Reconstruction into Amorphized Cobalt–Iron Oxyhydroxide Nanosheet Electrocatalysts for Greatly Improved Electrocatalytic Activity, *Small Methods*. 4 (2020) 1–10.
- [4] Y. Zheng, L. Zhang, H. Huang, F. Wang, L. Yin, H. Jiang, D. Wang, J. Yang, G. Zuo, ZIF-67-derived Co, Ni and S co-doped N-enriched porous carbon polyhedron as an efficient electrocatalyst for oxygen evolution reaction (OER), *Int. J. Hydrogen Energy*. 44 (2019)

27465–27471.

- [5] H. Zhong, X. Cheng, H. Xu, L. Li, D. Li, P. Tang, N. Alonso-Vante, Y. Feng, Carbon fiber paper supported interlayer space enlarged Ni<sub>2</sub>Fe-LDHs improved OER electrocatalytic activity, *Electrochim. Acta.* 258 (2017) 554–560.
- [6] K. Prabakaran, S.B. Ingavale, B. Kakade, Three dimensional NiS<sub>2</sub>-Ni(OH)<sub>2</sub>/CNT nanostructured assembly for supercapacitor and oxygen evolution reaction, *J. Alloys Compd.* 812 (2020) 152126.
- [7] H.J. Song, H. Yoon, B. Ju, D.Y. Lee, D.W. Kim, Electrocatalytic Selective Oxygen Evolution of Carbon-Coated Na<sub>2</sub>Co<sub>1-x</sub>Fe<sub>x</sub>P<sub>2</sub>O<sub>7</sub> Nanoparticles for Alkaline Seawater Electrolysis, *ACS Catal.* 10 (2020) 702–709.
- [8] Q. Wang, L. Shang, R. Shi, X. Zhang, Y. Zhao, G.I.N. Waterhouse, L.Z. Wu, C.H. Tung, T. Zhang, NiFe Layered Double Hydroxide Nanoparticles on Co,N-Codoped Carbon Nanoframes as Efficient Bifunctional Catalysts for Rechargeable Zinc–Air Batteries, *Adv. Energy Mater.* 7 (2017) 1700467.
- [9] S. Sekar, D.Y. Kim, S. Lee, Excellent Oxygen Evolution Reaction of Activated Carbon-Anchored NiO Nanotablets Prepared by Green Routes, *Nanomaterials.* 10 (2020) 1–13.
- [10] V.C. Hoang, K.N. Dinh, V.G. Gomes, Hybrid Ni/NiO composite with N-doped activated carbon from waste cauliflower leaves: A sustainable bifunctional electrocatalyst for efficient water splitting, *Carbon N. Y.* 157 (2020) 515–524.
- [11] S.H. Hsu, J. Miao, L. Zhang, J. Gao, H. Wang, H. Tao, S.F. Hung, A. Vasileff, S.Z. Qiao, B. Liu, An Earth-Abundant Catalyst-Based Seawater Photoelectrolysis System with 17.9% Solar-to-Hydrogen Efficiency, *Adv. Mater.* 30 (2018) 1–8.
